## 1 Gut Microbiome Signatures Linked to HIV-1 Reservoir Size and Viremia Control

2

3 Alessandra Borgognone<sup>1\*</sup>, Marc Noguera-Julian<sup>1,2</sup>, Bruna Oriol<sup>1,3</sup>, Laura Noël-Romas<sup>4,5</sup>, Marta Ruiz-  
4 Riol<sup>1</sup>, Yolanda Guillén<sup>6</sup>, Mariona Parera<sup>1</sup>, Maria Casadellà<sup>1</sup>, Clara Duran<sup>1,3</sup>, Maria C. Puertas<sup>1</sup>, Francesc  
5 Català-Moll<sup>1</sup>, Marlon De Leon<sup>4</sup>, Samantha Knodel<sup>4,5</sup>, Kenzie Birse<sup>4,5</sup>, Christian Manzardo<sup>7</sup>, Jose M. Miró<sup>7</sup>,  
6 Bonaventura Clotet<sup>1,2,3,8,9</sup>, Javier Martinez-Picado<sup>1,2,10</sup>, José Moltó<sup>8,9</sup>, Beatriz Mothe<sup>1,2,8,9</sup>, Adam  
7 Burgener<sup>4,5,11</sup>, Christian Brander<sup>1,2,10</sup>, Roger Paredes<sup>1,2,3,4,8,9\*</sup> & the BCN02 Study Group

8

9 <sup>1</sup> IrsiCaixa AIDS Research Institute, Hospital Universitari Germans Trias i Pujol, Barcelona, Catalonia, Spain

10 <sup>2</sup> University of Vic – Central University of Catalonia (UVic – UCC), Vic, Catalonia, Spain

11 <sup>3</sup> Universitat Autònoma de Barcelona (UAB), Barcelona, Catalonia, Spain

12 <sup>4</sup> Center for Global Health and Diseases, Department of Pathology, Case Western Reserve University,  
13 Cleveland, OH, United States of America

14 <sup>5</sup> Department of Obstetrics & Gynecology, University of Manitoba, Canada

15 <sup>6</sup> Institut Mar d'Investigacions mèdiques (IMIM), CIBERONC, Barcelona, Catalonia, Spain

16 <sup>7</sup> Infectious Diseases Service. Hospital Clinic - Institut d'Investigacions Biomèdiques August Pi i Sunyer  
17 (IDIBAPS)- University of Barcelona, Barcelona, Catalonia (Spain)

18 <sup>8</sup> Fight AIDS Foundation, Infectious Diseases Department, Germans Trias i Pujol University Hospital,  
19 Barcelona, Catalonia, Spain

20 <sup>9</sup> Department of Infectious Diseases Service, Germans Trias i Pujol University Hospital, Barcelona, Catalonia,  
21 Spain

22 <sup>10</sup> Catalan Institution for Research and Advanced Studies (ICREA), Barcelona, Catalonia, Spain

23 <sup>11</sup> Department of Medicine Solna, Center for Molecular Medicine, Karolinska Institute, Karolinska University  
24 Hospital, Stockholm, Sweden.

25

26

27

28

29

30

31

32

33

34 \*Correspondence should be addressed to Alessandra Borgognone (aborgognone@irsicaixa.es) & Roger  
35 Paredes (rparedes@irsicaixa.es); Infectious Diseases Department & IrsiCaixa AIDS Research Institute,  
36 Hospital Universitari Germans Trias i Pujol, Ctra. de Canyet s/n, Planta 2a, 08916 Badalona, Catalonia, Spain.

37 **Abstract**

38

39 **Background**

40 The potential role of the gut microbiome as a predictor of immune-mediated HIV-1 control in the absence of  
41 antiretroviral therapy (ART) is still unknown. In the BCN02 clinical trial, which combined the  
42 MVA.HIVconsv immunogen with the latency-reversing agent romidepsin in early-ART treated HIV-1  
43 infected individuals, 23% (3/13) of participants showed sustained low-levels of plasma viremia during 32  
44 weeks of a monitored ART pause (MAP). Here, we present a multi-omics analysis to identify compositional  
45 and functional gut microbiome patterns associated with HIV-1 control in the BCN02 trial.

46

47 **Results**

48 Viremic controllers during the MAP (controllers) exhibited higher *Bacteroidales/Clostridiales* ratio and lower  
49 microbial gene richness before vaccination and throughout the study intervention when compared to non-  
50 controllers. Longitudinal assessment indicated that the gut microbiome of controllers was enriched in pro-  
51 inflammatory bacteria and depleted in butyrate-producing bacteria and methanogenic archaea. Functional  
52 profiling also showed that metabolic pathways, including methanogenesis and carbohydrate biosynthesis,  
53 were significantly decreased in controllers. Fecal metaproteome analyses confirmed that baseline functional  
54 differences were mainly driven by *Clostridiales*. Participants with high baseline *Bacteroidales/Clostridiales*  
55 ratio had increased pre-existing immune activation-related transcripts. The *Bacteroidales/Clostridiales* ratio as  
56 well as host immune-activation signatures inversely correlated with HIV-1 reservoir size.

57

58 **Conclusions**

59 This proof-of-concept study suggests the *Bacteroidales/Clostridiales* ratio as a novel gut microbiome  
60 signature associated with HIV-1 reservoir size and immune-mediated viral control after ART interruption.

61

62

63

64

65

66

67

68

69

70

71

72

73

## 74 **Background**

75 A major obstacle to HIV-1 cure is the persistence of viral reservoirs. This mainly refers to latently-infected  
76 cells carrying transcriptionally-silent, replication-competent viruses which evade antiretroviral therapy (ART)  
77 as well as immune-mediated clearance[1–3]. The immune system is generally unable to contain HIV-1  
78 replication in the absence of ART[4]. However, up to 10-20% of subjects that initiate ART within first weeks  
79 after HIV-1 acquisition may temporarily achieve HIV-1 viremia suppression after ART interruption (ATI)[5].  
80 Understanding the mechanisms behind immune-mediated viremia control after ATI is key to progress towards  
81 a functional HIV cure. Broader and higher-magnitude CTL (cytotoxic T-lymphocyte) responses against less  
82 diverse HIV-1 epitopes[6,7] in the context of favorable HLA class I genotypes[8] and smaller HIV-1 reservoir  
83 size[9] have all been related to such post-treatment HIV-1 control.

84 There is indirect evidence that the gut microbiome might also contribute to immune-mediated control of HIV-  
85 1 replication[10,11]. Vaccine-induced gut microbiome alterations, consisting in lower bacterial diversity and  
86 negative correlation between richness and CD14<sup>+</sup>DR<sup>-</sup> monocytes in colorectal intraepithelial lymphocytes,  
87 have been recently associated with HIV/SIV (SHIV) protection in a non-human primate challenge study after  
88 mucosal vaccination with HIV/SIV peptides, modified vaccinia Ankara–SIV and HIV-gp120–CD4 fusion  
89 protein plus adjuvants through the oral route[12]. In the HVTN 096 trial[13] , where the impact of the gut  
90 microbiota on HIV-specific immune response to a DNA-prime, poxvirus-boost strategy in human adults was  
91 assessed, baseline and vaccine-induced gp41-reactive IgG titers were associated with different microbiota  
92 community structures, in terms of richness and composition[14]. In particular, co-occurring bacterial groups,  
93 such as *Ruminococcaceae*, *Peptoniphilaceae*, and *Bacteroidaceae*, were associated with vaccine-induced IgG  
94 response and inversely correlated with pre-existing gp41 binding IgG antibodies, suggesting that the  
95 microbiome may influence the immune response and vaccine immunogenicity[15]. Further evidence emerged  
96 from other studies in typhoid Ty21[16], rotavirus[17] and oral polio virus, tetanus-toxoid, bacillus Calmette-  
97 Guérin and hepatitis B immunization strategies[18], in which specific gut microbiome signatures  
98 (*Bifidobacterium*, *Streptococcus bovis* and *Clostridiales*, respectively) positively correlated with vaccine-  
99 induced immune response. In the absence of immune correlates of viral control, HIV cure trials usually  
100 incorporate an ART interruption phase to address the efficacy of a therapeutic intervention[19]. Data on the  
101 role of gut microbiome composition in the responsiveness to a curative strategy and the relationship with viral  
102 control after ART interruption are lacking. The BCN02 study[20] was a single-arm, proof of concept “kick &  
103 kill” clinical trial evaluating the safety and the *in vivo* effects of the histone deacetylase inhibitor romidepsin  
104 given as a latency reversing agent[21] in combination with a therapeutic HIV vaccine (MVA.HIVconsv) in a  
105 group of early-ART treated HIV-1-infected individuals[22,23]. During a monitored ART interruption (MAP),  
106 23% of individuals showed sustained viremia control up to 32 weeks of follow-up.

107 Here, we aimed to identify salient compositional and functional gut microbiome patterns associated with  
108 control of HIV-1 viremia after ART interruption in the “kick & kill” strategy used in the BCN02 study.

109

110

## 111 **Materials and Methods**

112

### 113 **Study design**

114 This was a sub-study derived from the BCN02 clinical trial (NCT02616874). The BCN02 was a multicenter,  
115 open-label, single-arm, phase I, proof of concept clinical trial in which 15 HIV-1-infected individuals with  
116 sustained viral suppression who started ART within the first six months after HIV transmission were enrolled  
117 to evaluate the safety, tolerability, immunogenicity and effect on the viral reservoir of a kick&kill strategy  
118 consisting of the combination of HIVconsv vaccines with romidepsin[20] (Additional Figures: Figure S1a).  
119 Fifteen individuals enrolled in the BCN02 trial (procedures for recruitment and eligibility criteria are detailed  
120 elsewhere[20]) were immunized with a first dose of MVA.HIVconsv (MVA1,  $2 \times 10^8$  pfu intramuscularly),  
121 followed by three weekly-doses of romidepsin (RMD<sub>1-2-3</sub>, 5 mg/m<sup>2</sup> BSA intravenously) and a second boost of  
122 MVA.HIVconsv (MVA2,  $2 \times 10^8$  pfu intramuscularly) four weeks after the last RMD<sub>3</sub> infusion. To assess the  
123 ability for viral control after ART interruption, participants underwent a monitored antiviral pause (MAP), 8  
124 weeks after the second vaccination (MVA2), for a maximum of 32 weeks or until any ART resumption  
125 criteria were met (plasma viral load > 2,000 copies/ml, CD4<sup>+</sup> cell counts < 500 cells/mm<sup>3</sup> and/or  
126 development of clinical symptoms related to an acute retroviral syndrome[20]). The study was conducted  
127 between February 2016 and October 2017 at two HIV-1 units from university hospitals in Barcelona (Hospital  
128 Germans Trias i Pujol and Hospital Clínic) and a community center (BCN-Checkpoint, Barcelona). The  
129 microbiome sub-study concept, design and patient information were reviewed and approved by the  
130 institutional ethical review board of the participating institutions (Reference Nr AC-15-108-R) and by the  
131 Spanish Regulatory Authorities (EudraCT 2015-002300-84). Written informed consent was provided by all  
132 study participants in accordance to the principles expressed in the Declaration of Helsinki and local personal  
133 data protection law (LOPD 15/1999).

134

### 135 **Sample disposition and data analysis**

136 Fourteen participants from the BCN02 trial consented to participate in the BCN02-microbiome study, one was  
137 excluded due to a protocol violation during MAP and thirteen were included for multi-omics analyses. Twelve  
138 from the thirteen participants that finalized the “kick & kill” intervention completed the MAP phase (n=3  
139 controllers and n=9 non-controllers) and one subject (B07) did not enter the MAP period due to immune  
140 futility pre-defined criteria and absence of protective HLA class I protective alleles associated with natural  
141 HIV-1 control (Additional Figures: Figure S1b). Based on the gut microbiome similarity with non-controllers  
142 at study entry and over the “kick & kill” intervention, the participant B07 was included in the non-controller  
143 arm to increase the statistical power in this microbiome sub-study.

144 Fecal specimens were longitudinally collected at BCN02 during the intervention period at study entry (pre-  
145 Vax), 1 week after 1<sup>st</sup> vaccination (MVA1), 1 week after RMD<sub>3</sub> (RMD) and 4 weeks after 2<sup>nd</sup> vaccination  
146 (MVA2). Samples were also collected over the MAP period (from 4 to 34 weeks after ART interruption) and

147 24 weeks after ART resumption (Additional Figures: Figure S1a). All samples were processed for shotgun  
148 metagenomics analysis. Taxonomical classification, microbial gene content and functional profiling were  
149 inferred using Metaphlan2[24], IGC reference catalog[25] and HUMAnN2[26], respectively. Sequencing  
150 analysis and quality control of metagenomics data are provided in the Additional Results section (Additional  
151 Text). To facilitate the interpretation, longitudinal time points were schematically grouped into three phases  
152 (Additional Figures: Figure S2a). Fecal material, peripheral blood mononuclear cells (PBMC) and plasma  
153 samples were also sampled at baseline to assess fecal metaproteome, host transcriptome profiles and soluble  
154 inflammation biomarkers, respectively (Additional Figures: Figure S2b). Microbial proteins from fecal  
155 samples were measured by mass spectrometry and protein identification performed using Mascot search  
156 engine (v2.4, Matrix Science) and Scaffold Q+ software (v4.9.0, Proteome Software)[27]. PBMC  
157 transcriptomes were evaluated using RNA-sequencing and sequence reads aligned to the human reference  
158 genome by STAR v2.5.3a[28]. Read counts estimation was inferred using RSEM v1.3.0[29] and differential  
159 expression analysis performed by DESeq2[30]. Plasma proteins were estimated using the Proximity Extension  
160 Assay based on the Olink Inflammation Panel[31]. Correlations between ‘omic’ datasets were computed using  
161 Spearman's correlation coefficients and integrative multi-omics analysis was assessed based on the mixOmics  
162 R package[32]. A detailed description of wet-lab procedures, bioinformatic methods and statistical analysis of  
163 metagenome, metaproteome, transcriptome, soluble plasma markers and multi-omics data is available in the  
164 Additional Methods section (Additional Text).

165

## 166 **Results**

167

### 168 **Patient characteristics**

169 In this microbiome sub-study, we evaluated 13 participants of the BCN02 study. Three had sustained plasma  
170 HIV-1 viremia (<2,000 copies/ml) during 32 weeks of MAP (viremic controllers), whereas 9 developed HIV-  
171 1 RNA rebound (>2,000 copies/ml) during MAP (non-controllers). One additional subject (B07) did not  
172 qualify for MAP due to pre-specified immune futility criteria and absence of protective HLA alleles, and  
173 therefore, was also considered a non-controller in this microbiome study. (Additional Figures: Figure S1b).  
174 Study participants were predominantly MSM (92%) of Caucasian ethnicity (92%), with median age of 42  
175 years and median body mass index of 22.9 kg/m<sup>2</sup> (Table 1). Median baseline CD4<sup>+</sup> T-cell counts were 728  
176 (416-1408) cells/ mm<sup>3</sup> and median CD4/CD8 T-cell ratio was 1.4 (0.97-1.9). All subjects had been on  
177 integrase strand-transfer inhibitor-based triple ART for >3 years, begun during the first 3 months after HIV-1  
178 infection. Median baseline HIV-1 proviral DNA was 140 copies/10<sup>6</sup> CD4<sup>+</sup> T-cells, being numerically lower in  
179 controllers than in non-controllers (65 vs 165 copies/10<sup>6</sup> CD4<sup>+</sup> T-cells,  $p=0.29$ ).

180

### 181 **Baseline gut-associated *Bacteroidales* / *Clostridiales* ratio discriminates between viremic controllers and** 182 **non-controllers**

183 Viremic controllers had significantly higher *Bacteroidales* levels than non-controllers at study entry (pre-Vax)  
184 ( $p = 0.007$ ) and during all the intervention phase (after the first MVA dose: MVA1  $p = 0.049$ , after the three  
185 romidepsin doses: RMD  $p = 0.049$  and after the second MVA dose: MVA2,  $p = 0.014$ ) (Fig. 1a, Additional  
186 Figures: Figures S3-S4) as well as lower *Clostridiales* ( $p = 0.014$ ) levels before vaccination (Fig. 1b,  
187 Additional Figures: Figures S3-S4). The *Bacteroidales/Clostridiales* ratio remained significantly higher in  
188 controllers throughout the intervention (pre-Vax,  $p = 0.007$  and MVA2,  $p = 0.028$ ) (Fig. 1c). In addition, non-  
189 controllers were enriched in *Erysipelotrichales* and *Coriobacteriales* (Additional Figures: Figure S4a) and  
190 showed significantly higher *Methanobacteriales* levels (Additional Figures: Figure S4b). More detailed  
191 analyses at lower taxonomic levels using the LEfSe algorithm (Additional Figures: Figure S5) showed that  
192 controllers were mainly enriched in *Prevotella copri*, as well as in *Haemophilus pittmaniae* and *Streptococcus*  
193 *parasanguinis*. In comparison, non-controllers were enriched in the *Clostridiales* species *Eubacterium rectale*  
194 *and siraeum*, *Subdoligranulum spp.* *Coprococcus*, and *Dorea longicatena*, as well as in *Collinsella*  
195 *aerofaciens* and *Methanobrevibacter spp.* A longitudinal analysis using the ‘feature-volatility’ function from  
196 qiime2 (Additional Figures: Figure S6) showed that such differences were sustained over the whole  
197 intervention period. All 9 non-controllers analyzed here resumed ART by week 4 after the MAP initiation,  
198 whereas the 3 controllers remained off ART for at least 28 weeks and up to 32 weeks. During the MAP,  
199 *Bacteroidales* showed an initial increase up to week 4 followed by a reduction by weeks 8-12 in controllers  
200 (Fig. 1a). Inversely, *Clostridiales* levels increased by weeks 8-12 and remained stable thereafter (Fig. 1b) (no  
201 statistical support provided during MAP). No significant differences in bacterial composition were found  
202 following ART resumption; however, there was a limited sample availability at ART resumption phase (Figs.  
203 1a-c).

204

### 205 **Viremic controllers display lower gut microbial diversity and richness over the intervention**

206 Controllers had lower microbial gene counts than non-controllers at the study entry and throughout the study  
207 intervention, although such differences lost statistical significance in the RMD and MVA2 assessments (Fig.  
208 2a). Intra-individual diversity (Shannon index) also remained numerically lower in controllers, but differences  
209 were not statistically significant (Fig. 2b). During the MAP, gut microbial diversity increased around weeks 8-  
210 10 in controllers, and remained stable thereafter (Figs. 2a-b). No statistically significant differences were  
211 found in microbial diversity following ART re-initiation (Figs. 2a-b). Using the Bray-Curtis index, controllers  
212 exhibited lower beta-diversity and higher similarity, particularly already at the study entry (Additional  
213 Figures: Figure S7), and showed less intra-host longitudinal evolution (Fig. 2c) than non-controllers  
214 (PERMANOVA,  $r^2 = 0.591$ ,  $p = 0.001$ ). Whereas the gut microbiome composition of controllers was  
215 significantly different from that of non-controllers (PERMANOVA,  $r^2 = 0.112$ ,  $p = 0.001$ ), no significant  
216 longitudinal differences were observed within each group (PERMANOVA,  $r^2 = 0.043$ ,  $p = 0.815$ ), suggesting  
217 that the combined intervention with MVA.HIVcons v vaccines and three weekly low-dose infusion of  
218 romidepsin did not significantly alter the gut-microbiome composition (Fig. 2c). Of note, results did not  
219 change after removing B07 from the non-controller arm (Additional Figures: Figure S8).

220

### 221 **Longitudinal microbial metabolic pathways differ between viremic controllers and non-controllers**

222 Functional profiling based on HUMAnN2[26] identified 28 differential metabolic pathways between  
223 controllers and non-controllers at study entry (unadjusted  $p < 0.05$ , Wilcoxon test) (Additional Figures: Figure  
224 S9 and S10a). Twelve out of the 28 pathways identified at study entry were differentially abundant throughout  
225 the intervention (Additional Figures: Figure S10b). Controllers were enriched in ‘fatty acid and lipid  
226 biosynthesis’ and ‘amino acid biosynthesis’ pathways. Conversely, metabolic pathways overrepresented in  
227 non-controllers included ‘methanogenesis from H<sub>2</sub> and CO<sub>2</sub>’, ‘carbohydrate biosynthesis’ and ‘generation of  
228 precursor metabolite and energy’. Longitudinal variations of such metabolic pathways during MAP and after  
229 ART re-initiation are shown (Additional Figures: Figure S11), although low numbers did not allow for  
230 statistical testing. The ‘methanogenesis from H<sub>2</sub> and CO<sub>2</sub>’ pathway was the most discriminant feature between  
231 the two groups (fold-change=11.5,  $p=0.04$ ). Consistently, methanogenic archaea (*Methanobrevibacter smithii*  
232 and *Methanosphaera stadtmanae*) were detected in most non-controllers and were rare or absent in controllers  
233 (Additional Figures: Figure S12). Taken together, these data show that differences between controllers and  
234 non-controllers emerged from resident microbial communities, before any intervention was started in BCN02  
235 study. Thus, subsequent analyses were focused on characterizing further potentially discriminant signatures at  
236 study entry.

237

### 238 **Increased *Bacteroidales/Clostridiales* ratio in viremic controllers negatively correlated with longitudinal 239 HIV-1 viral reservoir size**

240 The *Bacteroidales/Clostridiales* ratio inversely and significantly correlated with longitudinal total CD4<sup>+</sup> T  
241 cell-associated HIV-1 DNA measured at study entry ( $\rho = -0.6$ ,  $p = 0.03$ ) and over the “kick & kill”  
242 intervention, whereas an opposite trend was observed for gene richness ( $\rho = 0.65$ ,  $p = 0.01$  at study entry)  
243 (Fig. 3a). Alpha-diversity (Shannon index) exhibited weak positive correlation with the viral reservoir, being  
244 the correlation not significant. In line with the gut microbiota patterns found in controllers, the ratio  
245 *Bacteroidales/Clostridiales* showed a strong negative correlation with gene richness ( $\rho = -$   
246  $0.87$ ,  $p = 0.0001$ ) (Fig. 3a). In the longitudinal comparison, controllers tended to displayed lower viral  
247 reservoir size, although differences were not statistically significant (Fig. 3b). A similar trend was observed  
248 for cell-associated (CA) HIV-1 RNA (Figs. 3c-d), although stronger correlations were found at RMD and  
249 MVA2 timepoints with both *Bacteroidales/Clostridiales* ratio (RMD;  $\rho = -0.76$ ,  $p = 0.002$  and MVA2;  $\rho = -$   
250  $0.74$ ,  $p = 0.003$ ) and gene richness (RMD;  $\rho = 0.72$ ,  $p = 0.005$  and MVA2;  $\rho = 0.71$ ,  $p = 0.006$ ) (Fig. 3c).  
251 Moreover, in the longitudinal comparison, controllers displayed significantly lower CA HIV-1 RNA at RMD  
252 and MVA2 ( $p = 0.03$ ) (Fig. 3d). A set of clinical and vaccine-response variables was screened for association  
253 with gut microbial signatures. Absolute CD4<sup>+</sup> T-cell count before ART initiation was the only factor  
254 significantly associated with the *Bacteroidales/Clostridiales* ratio ( $\rho = 0.65$ ,  $p = 0.01$ ) and gene richness  
255 ( $\rho = -0.62$ ,  $p = 0.02$ ), whereas a strong and inverse correlations was found between the Shannon index  
256 and CD4/CD8 ratio at BCN02 study entry ( $\rho = 0.9$ ,  $p = 2.83e-05$ ) (Additional Figures: Figure S13).

257

## 258 **Distinct bacterial protein signatures associated with viremia control**

259 Baseline metaproteome analysis identified 15,214 bacterial proteins, annotated to 24 unique orders and 69  
260 genera across samples. The abundance of total *Clostridiales* or *Bacteroidales* was not different between  
261 groups (Figs. 4a-c). However, several *Clostridiales* genera were decreased in controllers, i.e.: *Eubacterium* (-  
262 3.71%;  $p=0.03$ ), *Pseudoflavonifractor* (-0.49%;  $p=0.049$ ), *Oscillibacter* (-0.14%;  $p=0.07$ ), whereas *Blautia*  
263 was increased (+5.02%;  $p=0.03$ ) (Fig. 4a). At the genus level, the relative abundance of *Erysipelotrichales* (-  
264 0.28%;  $p=0.07$ ), and *Coprobacillus* (-0.22%;  $p=0.07$ ) showed a decreasing trend in controllers, although  
265 differences were not statistically significant (Fig. 4b). Unbiased hierarchical clustering showed protein  
266 differences ( $p<0.025$ ) between groups (Fig. 4d). Viremic controllers were enriched in bacterial proteins from  
267 *Blautia* and *Ruminococcus*, and depleted in proteins derived from other *Clostridiales* such as *Clostridium*,  
268 *Eubacterium*, *Coprococcus*, *Faecalibacterium*, *Oscillibacter*, and *Pseudoflavinofractor*. Pathways associated  
269 with *Blautia* included galactose, starch/sucrose and glyoxylate/dicarboxylate metabolism as well as ribosome  
270 activity. (Fig. 4e). Butyrate and other short-chain fatty acid metabolism pathways were similar in both groups  
271 (Figs. 4d-e).

## 272 **Increased baseline immune activation and inflammatory response gene expression in viremic** 273 **controllers**

274 Full-PBMC gene expression analysis detected a total of 27,426 transcripts at baseline, after filtering for low-  
275 expressed genes. Using DESeq2[30], a total of 31 differentially expressed genes (DEGs) were identified ( $\log_2$   
276 FoldChange = 0 and BH-adjusted  $p$ -value < 0.1), of which 15 and 16 were upregulated in controllers and non-  
277 controllers, respectively (Fig. 5a). The proportion of protein-coding genes, pseudogenes, non-coding  
278 transcripts, TEC (genes to be experimentally confirmed), and long-intergenic noncoding genes within DEGs  
279 was 61.29%, 12.90%, 12.90%, 9.68 and 3.23%, respectively (Additional Table 1). We found 10 and 3 DEGs  
280 showing  $\log_2$ FC above 2 and 4, respectively; moreover 8 out of 10 genes with  $\log_2$ FC >2 at a Benjamini-  
281 Hochberg-adjusted  $p$ -value significance < 0.05 (Fig. 5a and Additional Table 1). Hierarchical clustering based  
282 on transcriptional DEG profiles showed that controllers grouped together, while non-controllers separated into  
283 two distinct expression groups (Additional Fig. 13a). Upregulated genes in non-controllers included 11  
284 transcripts with unknown function (Additional Table 2), which were excluded from downstream analyses. The  
285 most statistically differentially-expressed gene was myeloperoxidase (*MPO*, adjusted  $p$ -value =  $1.38e-06$ ),  
286 followed by a member of the folate receptor family (*FOLR3*, adjusted  $p$ -value =  $2.68e-05$ ) (Additional Figs.  
287 13b-c and Additional Table 2). Interestingly, both neutrophil-related transcripts *MPO* and *FOLR3* were  
288 upregulated in controllers (Fig. 5b) and have been implicated in immune response signaling and regulation of  
289 inflammatory processes[33,34]. Other transcripts with known associations to host defense and neutrophil-  
290 mediated immunity and higher expression in controllers included defensin alpha 1 and 4 (*DEFA1*, *DEFA4*),  
291 bactericidal permeability-increasing protein (*BPI*), cathepsin G (*CTSG*) and neutrophil elastase (*ELANE*) (Fig.  
292 5b and Additional Table 2). Gene Ontology (GO) enrichment analysis identified a number of biological  
293 processes associated with genes highly expressed in controllers (Additional Table 3). To reduce redundancy,



294 the complete list of GO terms was collapsed into representative subclasses using REVIGO. Many of these  
295 functions were associated with immune response, such as neutrophil-mediate immunity, leukocyte  
296 degranulation and antimicrobial humoral response (Fig. 5c).

297

### 298 **Increased baseline inflammation-related plasma proteins in viremic controllers**

299 Soluble factors in plasma from the 92 inflammation-related protein panel were assessed using the Proximity  
300 Extension Assay (see Methods in Additional Text). Plasma protein levels did not independently separate  
301 controllers from non-controllers using unbiased hierarchical clustering or principal component analysis  
302 (Additional Figs. 14a-b). Of the 92 plasma proteins characterized, only 7 were differentially expressed  
303 (Wilcoxon, uncorrected  $p < 0.05$ ) and were increased in controllers (Additional Fig. 14c): adenosine deaminase  
304 ADA ( $p = 0.012$ ), decoy receptor osteoprotegerin OPG ( $p = 0.024$ ), self-ligand receptor of the signaling  
305 lymphocytic activation molecule family SLAMF-1 ( $p = 0.048$ ), chemokines CCL23, CCL28, MCP-2 ( $p =$   
306  $0.048$ ) and the neurotrophic factor NT-3 ( $p = 0.048$ ) (Additional Fig. 14d).

307

### 308 **Integration analysis between *Bacteroidales/Clostridiales* ratio, host immune activation-related 309 transcripts, bacterial proteins and HIV-1 reservoir size**

310 The *Bacteroidales / Clostridiales* ratio was positively correlated (Spearman  $\rho = 0.55$  and  $q$ -value  $< 0.05$ ) with  
311 DEGs involved in inflammatory response and immune system activation, including *DEFA1*, *DEFA4*,  
312 *TOP1MT*, *CTSG*, *MPO*, *AZU1*, *ELANE* (Fig. 6a), Spearman  $\rho$  and  $q$  value are given in Additional Dataset 1.  
313 Functional enrichment analysis including all transcripts significantly correlated with the ratio  
314 *Bacteroidales/Clostridiales* (n. transcripts=453,  $q$ -value  $< 0.05$ , see Additional Dataset 1) identified four main  
315 functional clusters related to neutrophil activation, disruption of cells of other organism, antimicrobial  
316 humoral response and regulation of immune response to tumor cell (Additional Fig. 15a and Additional Table  
317 4). Of these, the *Bacteroidales / Clostridiales* ratio strongly correlated ( $\rho > 0.8$ ) with transcripts within such  
318 functional clusters, which were highly expressed in controllers (Fig. 6b).

319 Moreover, 61 and 70 out 453 transcripts (Additional Dataset 2) correlated ( $\rho = 0.5$ ) with the baseline CA  
320 HIV-1 RNA and HIV-1 DNA, respectively, and were enriched in immune-mediated response functions  
321 (Additional Figs. 15b-c and Additional Table 5). In the integrated analysis of metagenomic, transcriptomic  
322 and metaproteomic data to identify signatures discriminating between controllers and non-controllers,  
323 *Bacteroidales* and *Clostridiales* were clearly separated through the component (Additional Fig. 16a). While  
324 *Bacteroidales* clustered with immune activation-related transcripts (*MPO*, *AZU1*, *ELANE*, *TCN1*, *DEFA1*,  
325 *BPI*, *DEF4*) and proteins from *Ruminococcus*, *Blautia*, *Prevotella* and *Faecalibacterium* genera, *Clostridiales*  
326 inversely correlated with these features (Additional Figs. 16a-b). Such associations were assessed at a lower  
327 taxonomic scale and confirmed that *Bacteroidales* species (*B. dorei* and *B. eggerthii*) inversely correlated with  
328 HIV-1 DNA levels, whereas members of *Clostridiales* (*S. unclassified*, *D. formicigenerans* and *E. siraeum*)  
329 positively correlated with HIV-1 DNA and CA HIV-1 RNA levels. The viral reservoir (HIV-1 DNA and CA  
330 HIV-1 RNA) negatively correlated with genes involved in ‘neutrophil mediated immunity’, ‘antimicrobial

331 humoral response' and 'cell killing'. Weak correlations were observed with bacterial proteins involved in the  
332 regulation of metabolism (Fig. 6c and Additional Dataset 2). Overall, these findings further supported positive  
333 associations between *Bacteroidales* abundance and transcripts related to immune response in controllers,  
334 which in turn negatively correlated with the viral reservoir size.

335

## 336 **Discussion**

337 In this proof-of-concept study, a longitudinal multi-'omics' analysis identified the *Bacteroidales/Clostridiales*  
338 ratio as a novel gut microbiome signature associated with HIV-1 reservoir size and viremic control during a  
339 monitored ART pause. Individuals with high *Bacteroidales/Clostridiales* ratio showed gene expression  
340 signatures related to immune activation, particularly neutrophil-mediated immunity and antimicrobial humoral  
341 response, which negatively correlated with the viral reservoir size. Our findings largely arise from  
342 unsupervised analyses where many other signatures could have emerged, especially given the relatively low  
343 number of individuals analyzed. However, they are internally coherent and consistent with a theoretical  
344 framework where increased inflammation might contribute to immune-mediated HIV-1 control. They also  
345 suggest a putative biomarker for safer ART interruptions in HIV cure studies.

346 The baseline gut microbiome of controllers was enriched in pro-inflammatory species, such as *P. copri*[35],  
347 and depleted in bacteria, traditionally associated with the maintenance of gut homeostasis through production  
348 of SCFAs[36], including *R. intestinalis* and *Subdoligranulum spp.* Lower microbial diversity and gene  
349 richness in controllers were consistent with a previous work from our group in people living with HIV[37], as  
350 well as other studies[38], in which higher gene richness associated with increased levels of butyrate-producing  
351 bacteria and methanogenic archaea. Microbial functional enrichment in 'lipid and fatty acid biosynthesis' in  
352 controllers might be reflective of mechanisms of lipopolysaccharide biosynthesis and production of  
353 inflammatory mediators[39] mediated by members of *Bacteroidales*[40]. No discernible longitudinal  
354 variations were observed in the gut microbiome of BCN02 participants, in line with a previous evidence in  
355 oral typhoid immunization strategy[16]. Of note, the gut microbiome in healthy population has been described  
356 generally resilient to perturbations[41]. Taken together, these observations would suggest a trend toward the  
357 maintenance of a relative stability in the gut microbiome composition, with resident microbial communities  
358 potentially associated with viral control during ART interruption. Baseline metaproteome analysis confirmed  
359 that functional differences between controllers and non-controllers were mainly driven by *Clostridiales*,  
360 which were actively producing microbial proteins in both groups albeit in distinct functional contexts. Further  
361 discriminating baseline signatures linked to increased immune system activation and inflammatory response  
362 in controllers emerged from PBMC transcriptome and inflammation-related plasma proteins profiling. It also  
363 emerged that the ratio *Bacteroidales/Clostridiales* inversely correlated with the viral reservoir size in terms of  
364 HIV-1 DNA and CA HIV-1 RNA. Although controllers did not display significantly lower viral reservoir size  
365 compared to non-controllers, these associations are consistent with previous studies suggesting a role of low  
366 viral reservoir on ART interruption outcomes[9].

367 Taken together, these findings suggest that baseline immune activation potentially associated with a microbial  
368 shift toward pro-inflammatory bacteria and lower viral reservoir may contribute to sustained post ART  
369 interruption HIV-1 control. While there is evidence suggesting a strong impact of the gut microbiota  
370 composition on host immune system and inflammatory status[42], the mechanistic basis of how microbial  
371 communities may interact with the viral reservoir and, in turn, exert immunomodulatory effects on HIV-1  
372 control during ART interruption remains to be delineated. We speculate that a pre-existing, altered balance of  
373 ‘beneficial’ gut microbial groups, such as *Clostridiales*, and concomitant overabundance of pro-inflammatory  
374 bacteria would boost host immune system activation, thus triggering a prompt control of rebounding virus, as  
375 observed in controllers. In support of this hypothesis, increased abundance of members from *Clostridiales*  
376 were previously associated with neutrophilia and lower poliovirus and tetanus-hepatitis B vaccine  
377 response[18]. Moreover, baseline transcriptional pro-inflammatory and immune activation signatures were  
378 suggested as potential predictors of increased influenza[43], systemic lupus erythematosus[44] and hepatitis  
379 B[45] vaccine-induced immune response, with weaker responses in elderly[43,45]. It is thus reasonable to  
380 postulate that immune activation prior to vaccination together with microbiome-associated factors may affect  
381 vaccine outcomes.

382 This study has several limitations. Due to eligibility criteria in the parental BCN02 study, there was a limited  
383 sample size, and we were unable to include a control arm without the intervention. Therefore, our  
384 considerations were narrowed to three individuals that showed viremic control during ART interruption.  
385 Bearing these limitations in mind, our results should be interpreted with caution, emphasizing the need of  
386 independent validation in randomized and placebo-controlled trials to assess potentially unmeasured  
387 confounders and provide further perspectives on factors that might induce gut microbial shifts. Upcoming  
388 analyses in larger longitudinal trials, including the recently reported AELIX-002 trial[46], where fecal  
389 samples have been stored longitudinally, are expected to validate our findings. These preliminary findings  
390 might have important implications in the design of HIV-1 cure intervention trials that include ART  
391 interruption. As proposed for other therapeutic areas[47], microbiome-associated predictive patterns could  
392 help to optimize patient stratification, thus resulting in more targeted studies and higher efficacy of HIV-1  
393 interventions. In addition, if a given resident microbial community is to be defined that is indeed predictive of  
394 viral control during ART interruption, then modulating participants’ gut microbiota before immunization  
395 might potentially modulate vaccine responsiveness and ultimately, clinical outcomes. While host-genetics and  
396 other vaccine-associated factors as baseline predictors are less amendable, the gut microbiome is potentially  
397 modifiable and even transferrable to another host. Strategies manipulating the gut microbiota composition and  
398 relative by-products via prebiotics and/or probiotics administration[48] or microbiota engraftment following  
399 fecal microbiota transplantation[49] are under intense evaluation[50], albeit with several limitations.

400

401 **Conclusions**

402 In conclusion, in this exploratory study, we identified pre-existing gut microbial and immune activation  
403 signatures as potential predictors of sustained HIV-1 control in the absence of ART, providing a potential  
404 target for future treatment strategies and opening up new avenues for a functional HIV cure.

405

#### 406 **Availability of data and materials**

407 Datasets supporting the conclusions of this study are available as Additional information (Additional  
408 Datasets). Metagenome and RNA-seq data have been deposited in the European Nucleotide Archive  
409 (ENA) and are accessible through ENA accession numbers PRJEB42384 and PRJEB43195. The code and  
410 databases used for data analysis are available as Additional information (Additional Code) and at  
411 10.5281/zenodo.4876340.

412

#### 413 **Abbreviations**

414 **ART:** antiretroviral therapy

415 **ATI:** antiretroviral therapy interruption

416 **HUMAnN2:** HMP unified metabolic analysis network v.2

417 **MAP:** monitored antiretroviral therapy pause

418 **MVA:** MVA.HIVconsv

419 **RMD:** romidepsin

420 **SCFA:** short chain fatty acids

421

#### 422 **References**

- 423 1. Volberding PA, Deeks SG. Antiretroviral therapy and management of HIV infection. *Lancet*. 2010. p. 49–  
424 62.
- 425 2. Finzi D, Hermankova M, Pierson T, Carruth LM, Buck C, Chaisson RE, et al. Identification of a reservoir  
426 for HIV-1 in patients on highly active antiretroviral therapy. *Science* (80- ). 1997;278:1295–300.
- 427 3. Siliciano JD, Kajdas J, Finzi D, Quinn TC, Chadwick K, Margolick JB, et al. Long-term follow-up studies  
428 confirm the stability of the latent reservoir for HIV-1 in resting CD4+ T cells. *Nat Med*. 2003;9:727–8.
- 429 4. Chun TW, Davey RT, Engel D, Lane HC, Fauci AS. AIDS: Re-emergence of HIV after stopping therapy.  
430 *Nature*. 1999;401:874–5.
- 431 5. Namazi G, Fajnzylber JM, Aga E, Bosch RJ, Acosta EP, Sharaf R, et al. The control of HIV after  
432 antiretroviral medication pause (CHAMP) study: Posttreatment controllers identified from 14 clinical studies.  
433 *J Infect Dis*. 2018;218:1954–63.
- 434 6. Turnbull EL, Wong M, Wang S, Wei X, Jones NA, Conrod KE, et al. Kinetics of Expansion of Epitope-  
435 Specific T Cell Responses during Primary HIV-1 Infection. *J Immunol*. 2009;182:7131–45.
- 436 7. Liu MKP, Hawkins N, Ritchie AJ, Ganusov V V., Whale V, Brackenridge S, et al. Vertical T cell  
437 immunodominance and epitope entropy determine HIV-1 escape. *J Clin Invest*. 2013;123:380–93.
- 438 8. Posteraro B, Pastorino R, Di Giannantonio P, Ianuale C, Amore R, Ricciardi W, et al. The link between

- 439 genetic variation and variability in vaccine responses: Systematic review and meta-analyses. *Vaccine*.  
440 2014;32:1661–9.
- 441 9. Li JZ, Etemad B, Ahmed H, Aga E, Bosch RJ, Mellors JW, et al. The size of the expressed HIV reservoir  
442 predicts timing of viral rebound after treatment interruption. *AIDS*. 2016;30:343–53.
- 443 10. Zimmermann P, Curtis N. The influence of the intestinal microbiome on vaccine responses. *Vaccine*.  
444 2018. p. 4433–9.
- 445 11. Ciabattini A, Olivieri R, Lazzeri E, Medaglini D. Role of the microbiota in the modulation of vaccine  
446 immune responses. *Front. Microbiol*. 2019.
- 447 12. Sui Y, Lewis GK, Wang Y, Berckmueller K, Frey B, Dzutsev A, et al. Mucosal vaccine efficacy against  
448 intrarectal SHIV is independent of anti-Env antibody response. *J Clin Invest*. 2019;129:1314–28.
- 449 13. Pantaleo G, Janes H, Karuna S, Grant S, Ouedraogo GL, Allen M, et al. Safety and immunogenicity of a  
450 multivalent HIV vaccine comprising envelope protein with either DNA or NYVAC vectors (HVTN 096): a  
451 phase 1b, double-blind, placebo-controlled trial. *Lancet HIV*. 2019;6:e737–49.
- 452 14. Pantaleo G, Janes H, Tomaras G, Montefiori D, Frahm N, Grant S, et al. Comparing different priming  
453 strategies to optimize HIV vaccine antibody responses: results from HVTN 096/EV04 (NCT01799954). *AIDS*  
454 *Res Hum retroviruses Conf 2nd HIV Res Prev Conf HIVR4P 2016 United states* [Internet]. 2016;32:68.  
455 Available from: <https://www.cochranelibrary.com/central/doi/10.1002/central/CN-01646903/full>
- 456 15. Cram JA, Fiore-Gartland AJ, Srinivasan S, Karuna S, Pantaleo G, Tomaras GD, et al. Human gut  
457 microbiota is associated with HIV-reactive immunoglobulin at baseline and following HIV vaccination. *PLoS*  
458 *One*. 2019;14.
- 459 16. Eloë-Fadrosch EA, McArthur MA, Seekatz AM, Drabek EF, Rasko DA, Sztein MB, et al. Impact of Oral  
460 Typhoid Vaccination on the Human Gut Microbiota and Correlations with *S. Typhi*-Specific Immunological  
461 Responses. *PLoS One*. 2013;8.
- 462 17. Harris VC, Armah G, Fuentes S, Korpela KE, Parashar U, Victor JC, et al. Significant Correlation  
463 Between the Infant Gut Microbiome and Rotavirus Vaccine Response in Rural Ghana. *J Infect Dis*.  
464 2017;215:34–41.
- 465 18. Huda MN, Lewis Z, Kalanetra KM, Rashid M, Ahmad SM, Raqib R, et al. Stool microbiota and vaccine  
466 responses of infants. *Pediatrics*. 2014;134.
- 467 19. Julg B, Dee L, Ananworanich J, Barouch DH, Bar K, Caskey M, et al. Recommendations for analytical  
468 antiretroviral treatment interruptions in HIV research trials—report of a consensus meeting. *Lancet HIV*.  
469 2019. p. e259–68.
- 470 20. Mothe B, Rosás-Umbert M, Coll P, Manzardo C, Puertas MC, Morón-López S, et al. HIVconsV Vaccines  
471 and Romidepsin in Early-Treated HIV-1-Infected Individuals: Safety, Immunogenicity and Effect on the Viral  
472 Reservoir (Study BCN02). *Front Immunol*. 2020;11.
- 473 21. Wei DG, Chiang V, Fyne E, Balakrishnan M, Barnes T, Graupe M, et al. Histone Deacetylase Inhibitor  
474 Romidepsin Induces HIV Expression in CD4 T Cells from Patients on Suppressive Antiretroviral Therapy at  
475 Concentrations Achieved by Clinical Dosing. *PLoS Pathog*. 2014;10.

- 476 22. Mothe B, Manzardo C, Sanchez-Bernabeu A, Coll P, Morón-López S, Puertas MC, et al. Therapeutic  
477 Vaccination Refocuses T-cell Responses Towards Conserved Regions of HIV-1 in Early Treated Individuals  
478 (BCN 01 study). *EClinicalMedicine*. 2019;11:65–80.
- 479 23. Létourneau S, Im EJ, Mashishi T, Brereton C, Bridgeman A, Yang H, et al. Design and pre-clinical  
480 evaluation of a universal HIV-1 vaccine. *PLoS One*. 2007;2.
- 481 24. Truong DT, Franzosa EA, Tickle TL, Scholz M, Weingart G, Pasolli E, et al. MetaPhlan2 for enhanced  
482 metagenomic taxonomic profiling. *Nat. Methods*. 2015. p. 902–3.
- 483 25. Li J, Wang J, Jia H, Cai X, Zhong H, Feng Q, et al. An integrated catalog of reference genes in the human  
484 gut microbiome. *Nat Biotechnol*. 2014;32:834–41.
- 485 26. Franzosa EA, McIver LJ, Rahnavard G, Thompson LR, Schirmer M, Weingart G, et al. Species-level  
486 functional profiling of metagenomes and metatranscriptomes. *Nat Methods*. 2018;15:962–8.
- 487 27. Klatt NR, Cheu R, Birse K, Zevin AS, Perner M, Noël-Romas L, et al. Vaginal bacteria modify HIV  
488 tenofovir microbicide efficacy in African women. *Science (80- )*. 2017;356:938–45.
- 489 28. Dobin A, Davis CA, Schlesinger F, Drenkow J, Zaleski C, Jha S, et al. STAR: ultrafast universal RNA-seq  
490 aligner. *Bioinformatics [Internet]*. 2013 [cited 2017 Feb 22];29:15–21. Available from:  
491 <http://www.ncbi.nlm.nih.gov/pubmed/23104886>
- 492 29. Li B, Dewey CN. RSEM: Accurate transcript quantification from RNA-Seq data with or without a  
493 reference genome. *BMC Bioinformatics*. 2011;12.
- 494 30. Love MI, Huber W, Anders S. Moderated estimation of fold change and dispersion for RNA-seq data with  
495 DESeq2. *Genome Biol*. 2014;15.
- 496 31. Assarsson E, Lundberg M, Holmquist G, Björkstén J, Thorsen SB, Ekman D, et al. Homogenous 96-plex  
497 PEA immunoassay exhibiting high sensitivity, specificity, and excellent scalability. *PLoS One*. 2014;9.
- 498 32. Rohart F, Gautier B, Singh A, Lê Cao KA. mixOmics: An R package for ‘omics feature selection and  
499 multiple data integration. *PLoS Comput Biol*. 2017;13.
- 500 33. Aratani Y. Myeloperoxidase: Its role for host defense, inflammation, and neutrophil function. *Arch.*  
501 *Biochem. Biophys*. 2018. p. 47–52.
- 502 34. Holm J, Hansen SI. Characterization of soluble folate receptors (folate binding proteins) in humans.  
503 Biological roles and clinical potentials in infection and malignancy. *Biochim. Biophys. Acta - Proteins*  
504 *Proteomics*. 2020.
- 505 35. Iljazovic A, Roy U, Gálvez EJC, Lesker TR, Zhao B, Gronow A, et al. Perturbation of the gut microbiome  
506 by *Prevotella* spp. enhances host susceptibility to mucosal inflammation. *Mucosal Immunol*. 2020;
- 507 36. Lopetuso LR, Scaldaferrri F, Petito V, Gasbarrini A. Commensal Clostridia: Leading players in the  
508 maintenance of gut homeostasis. *Gut Pathog*. 2013.
- 509 37. Guillén Y, Noguera-Julian M, Rivera J, Casadellà M, Zevin AS, Rocafort M, et al. Low nadir CD4+ T-  
510 cell counts predict gut dysbiosis in HIV-1 infection. *Mucosal Immunol*. 2019;12:232–46.
- 511 38. Le Chatelier E, Nielsen T, Qin J, Prifti E, Hildebrand F, Falony G, et al. Richness of human gut  
512 microbiome correlates with metabolic markers. *Nature*. 2013;500:541–6.

- 513 39. Medzhitov R, Janeway C. J. Advances in immunology: Innate immunity. *N Engl J Med.* 2000;343:338–  
514 44.
- 515 40. d’Hennezel E, Abubucker S, Murphy LO, Cullen TW. Total Lipopolysaccharide from the Human Gut  
516 Microbiome Silences Toll-Like Receptor Signaling. *mSystems.* 2017;2.
- 517 41. Fassarella M, Blaak EE, Penders J, Nauta A, Smidt H, Zoetendal EG. Gut microbiome stability and  
518 resilience: Elucidating the response to perturbations in order to modulate gut health. *Gut.* 2020.
- 519 42. Zheng D, Liwinski T, Elinav E. Interaction between microbiota and immunity in health and disease. *Cell*  
520 *Res.* 2020. p. 492–506.
- 521 43. Avey S, Cheung F, Fermin D, Frelinger J, Gaujoux R, Gottardo R, et al. Multicohort analysis reveals  
522 baseline transcriptional predictors of influenza vaccination responses. *Sci Immunol.* 2017;2.
- 523 44. Kotliarov Y, Sparks R, Martins AJ, Mulè MP, Lu Y, Goswami M, et al. Broad immune activation  
524 underlies shared set point signatures for vaccine responsiveness in healthy individuals and disease activity in  
525 patients with lupus. *Nat Med.* 2020;26:618–29.
- 526 45. Fourati S, Cristescu R, Loboda A, Talla A, Filali A, Railkar R, et al. Pre-vaccination inflammation and B-  
527 cell signalling predict age-related hyporesponse to hepatitis B vaccination. *Nat Commun.* 2016;7.
- 528 46. Lucia Bailon, Anuska Llano, Samandhy Cedeño, Miriam B. Lopez, Yovaninna Alarcón-Soto, Pep Coll,  
529 Àngel Rivero, Anne R. Leselbaum, Ian McGowan, Devi SenGupta, Bonaventura Clotet, Christian Brander,  
530 Jose Molt BM. A placebo-controlled ATI trial of HTI vaccines in early treated HIV infection. *CROI - Virtual*  
531 *Conf Retroviruses Opportunistic Infect.* 2021.
- 532 47. Boessen R, Heerspink HJL, De Zeeuw D, Grobbee DE, Groenwold RHH, Roes KCB. Improving clinical  
533 trial efficiency by biomarker-guided patient selection. *Trials.* 2014;15.
- 534 48. Wilson NL, Moneyham LD, Alexandrov AW. A Systematic Review of Probiotics as a Potential  
535 Intervention to Restore Gut Health in HIV Infection. *J Assoc Nurses AIDS Care.* 2013;24:98–111.
- 536 49. Vujkovic-Cvijin I, Rutishauser RL, Pao M, Hunt PW, Lynch S V., McCune JM, et al. Limited engraftment  
537 of donor microbiome via one-time fecal microbial transplantation in treated HIV-infected individuals. *Gut*  
538 *Microbes.* 2017;8:440–50.
- 539 50. Rosel-Pech C, Chávez-Torres M, Bekker-Méndez VC, Pinto-Cardoso S. Therapeutic avenues for restoring  
540 the gut microbiome in HIV infection. *Curr. Opin. Pharmacol.* 2020. p. 188–201.

541

## 542 **Acknowledgements**

543 The authors thank all volunteers for participating in this study and the BCN02 study group.

544

545 **BCN02 Study Group.** IrsiCaixa AIDS Research Institute-HIVACAT Hospital Universitari Germans Trias i  
546 Pujol, Badalona, Spain: Susana Benet, Christian Brander, Samandhy Cedeño, Bonaventura Clotet, Pep Coll,  
547 Anuska Llano, Javier Martinez-Picado, Marta Marszalek, Sara Morón-López, Beatriz Mothe, Roger Paredes,  
548 Maria C. Puertas, Miriam Rosás-Umbert, Marta Ruiz-Riol. Fundació Lluita contra la Sida, Infectious Diseases  
549 Department, Hospital Universitari Germans Trias i Pujol, Badalona, Spain: Roser Escrig, Silvia Gel, Miriam

550 López, Cristina Miranda, José Moltó, Jose Muñoz, Nuria Perez-Alvarez, Jordi Puig, Boris Revollo, Jessica  
551 Toro. Germans Trias i Pujol Research Institute, Badalona, Spain: Ana María Barriocanal, Cristina Perez-  
552 Reche. Clinical Pharmacology Unit, Hospital Universitari Germans Trias i Pujol, Badalona, Spain: Magí  
553 Farré. Pharmacokinetic/pharmacodynamic modeling and simulation, Institut de Recerca de l'Hospital de la  
554 Santa Creu i Sant Pau-IIB Sant Pau, Barcelona, Spain: Marta Valle. Hospital Clinic- HIVACAT, IDIBAPS,  
555 University of Barcelona, Barcelona, Spain: Christian Manzardo, Juan Ambrosioni, Irene Ruiz, Cristina  
556 Rovira, Carmen Hurtado, Carmen Ligeró, Emma Fernández, Sonsoles Sánchez-Palomino, and Jose M. Miró.  
557 Projecte dels NOMS-Hispanosida, BCN Checkpoint, Barcelona, Spain: Antonio Carrillo, Michael Meulbroek,  
558 Ferran Pujol and Jorge Saz. The Jenner Institute, The Nuffield Department of Medicine, University of Oxford,  
559 UK: Nicola Borthwick, Alison Crook, Edmund G. Wee and Tomás Hanke.

560

### 561 **Funding**

562 This study was funded by Instituto de Salud Carlos III through the project "PI16/01421" (co-funded by  
563 European Regional Development Fund "A way to make Europe"). The project was sponsored in part by  
564 Grifols and received funding from the European Union's Horizon 2020 Research and Innovation Programme  
565 under Grant Agreement N° 847943 (MISTRAL). The BCN02 clinical trial was an investigator-initiated study  
566 funded by the ISCIII PI15/01188 grant, the HIVACAT Catalan research program for an HIV vaccine and the  
567 Fundació Gloria Soler. Some sub-analyses of the BCN02 trial were partly funded by the European Union's  
568 Horizon 2020 research and innovation program under grant agreement 681137-EAVI2020 and by NIH grant  
569 P01-AI131568. A.Bu lab was supported by grants from the Canadian Institutes of Health Research (HB3-  
570 164066) and the National Institutes for Health Research (R01DK112254). J.M.P lab was supported by grant  
571 PID2019-109870RB-I00 from the Spanish Ministry of Science and Innovation and in part by Grifols. J.M.M.  
572 received a personal 80:20 research grant from Institut d'Investigacions Biomèdiques August Pi i Sunyer  
573 (IDIBAPS), Barcelona, Spain, during 2017–21.

574

### 575 **Author Contributions**

576 R.P, B.M, J.M, B.C, J.M.M and C.B, conceived and designed the study. B.M, R.P, C.M, J.M.M and C.B  
577 recruited the study participants and performed their clinical evaluations. M.P and M.C performed fecal DNA  
578 extraction, library preparation and sequencing, under the supervision of M.N.J, Y.G and R.P. B.O and C.D  
579 performed PBMC transcriptomics and soluble factors determinations, under the supervision of M.R.R and  
580 C.B. M.C.P performed the viral reservoir size determinations, under the supervision of J.M.P. L.N.R, M.D.L,  
581 S.K and K.B performed fecal metaproteomics experiments and data analysis, under the supervision of A.Bu.  
582 A.Bo performed bioinformatics and statistical analyses of metagenome, transcriptome, soluble factors, clinical  
583 and integration data, under the supervision of M.N.J and R.P. L.N.R performed the bioinformatics and  
584 statistical analyses of fecal metaproteome data, under the supervision of A.Bu. F.C.M, M.N.J, A.Bo, B.O and  
585 Y.G contributed to data management. A.Bo and R.P wrote the paper, which was reviewed, edited and  
586 approved by all authors.



587

588 **Competing interests**

589 The authors declare no competing interests.

590

591

592

593

594 **Figures**

595

**a**

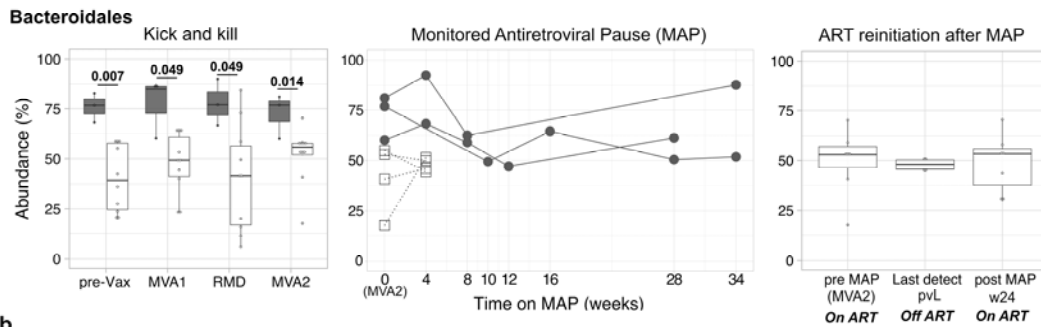

**b**

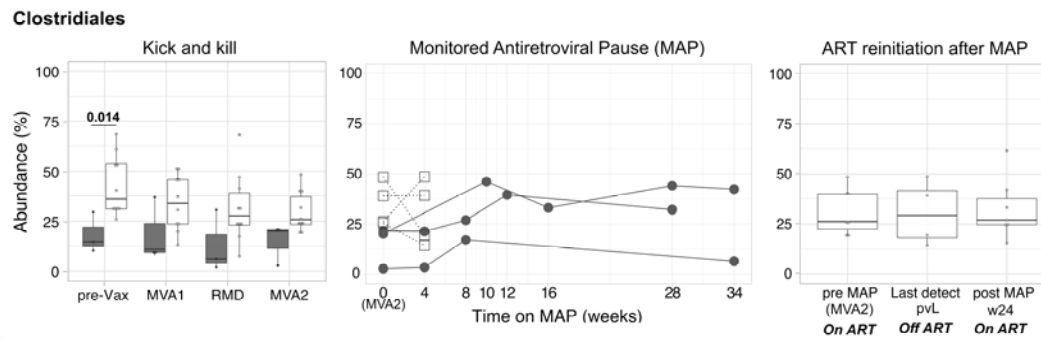

**c**

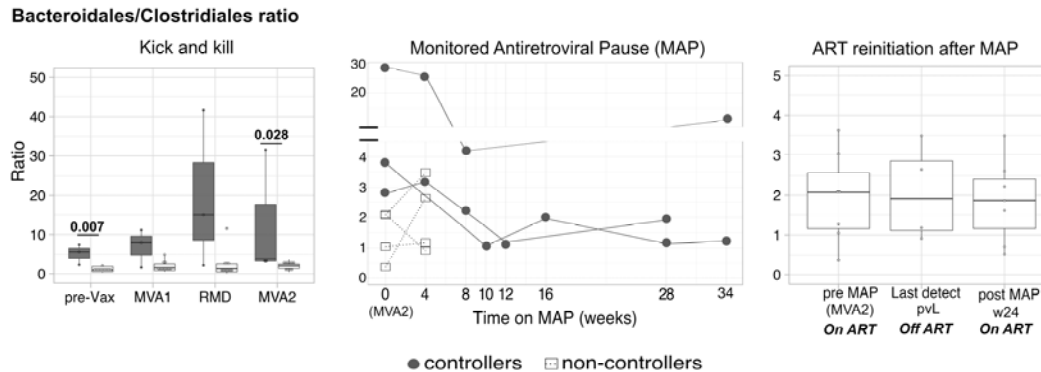

596

597

598 **Fig 1. Higher longitudinal *Bacteroidales*/*Clostridiales* ratio in viremic controllers.** Relative abundance  
 599 expressed as percentage of (a), *Bacteroidales*, (b) *Clostridiales* and (c) their ratio in controllers (gray) and  
 600 non-controllers (white) are represented by boxplots (left and right vertical panels) and line plots (middle  
 601 vertical panels). In line plots, values for each subject are illustrated by white squares (non-controllers) and  
 602 grey dots (viremic controllers). Boxplots show the median (horizontal black line) and interquartile range  
 603 between the first and third quartiles (25<sup>th</sup> and 75<sup>th</sup>, respectively). Third vertical panels show non-controllers  
 604 before ART interruption (pre-MAP, n=7), last timepoint on MAP before ART resumption (Last detect pVL,  
 605 n=4) and 24 weeks after ART resumption (post MAP w4, n=7). Abbreviations: MAP, monitored antiretroviral  
 606 pause; pre-Vax, baseline (1 day before first MVA vaccination); MVA1, 1 week after first MVA vaccination;  
 607 RMD, 1 week after third romidepsin infusion; MVA2, 4 weeks after second MVA vaccination.

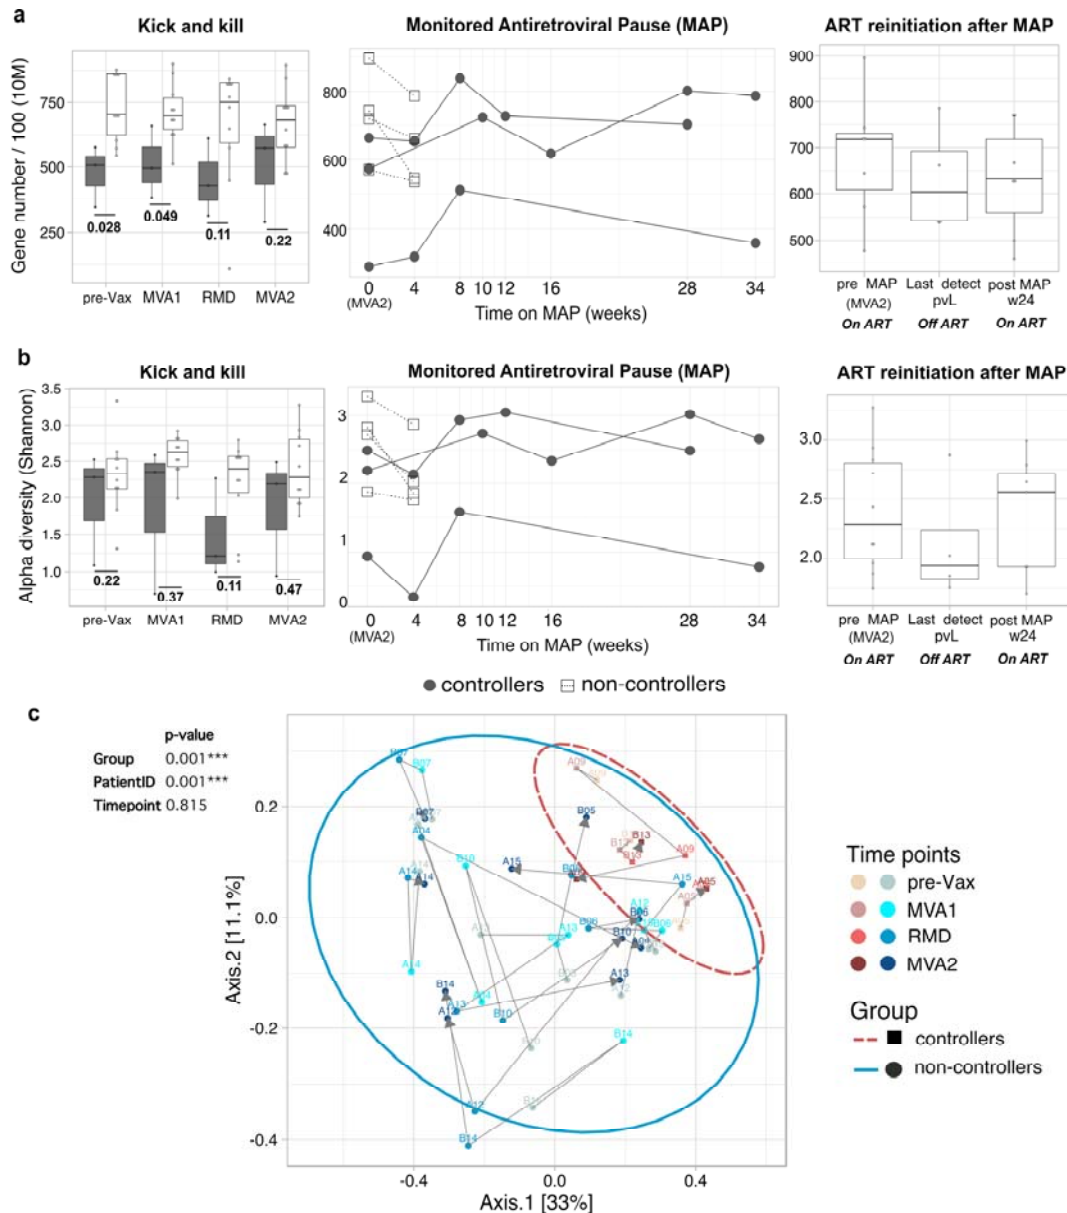

608

609

610 **Fig 2. Lower microbial diversity and richness in controllers.** Longitudinal (a) microbial gene richness at  
 611 10 million (10M filtered reads) down-sampling size and (b) alpha diversity based on Shannon index in  
 612 viremic controllers (gray) and non-controllers (white). c, Principal coordinates analysis (PCoA) of microbial  
 613 diversity based on Bray-Curtis distances at pre-vaccination and during 'kick and kill' intervention. Proportion  
 614 of variance explained by each principal coordinate axis is reported in the corresponding axis label. Subjects  
 615 per each group are represented by squares (controllers) and circles (non-controllers). Each point stands for one  
 616 subject, color coded by group and time point. The increase in purple (controllers) and blue (non-controllers)  
 617 colors reflects sequential time points from baseline (pre-Vax) to the second vaccine administration (MVA2).  
 618 Ellipses delineate the distribution of points per each group. Gray arrows link directional changes in bacterial  
 619 abundance throughout the kick and kill intervention from baseline (pre-Vax). PERMANOVA statistical

620 analysis of samples grouped by Group, PatientID (patient internal identifier) and time point is shown on the  
621 top of the panel. Abbreviations: MAP, monitored antiretroviral pause; pre-Vax, baseline (1 day before first  
622 MVA vaccination); MVA1, 1 week after first MVA vaccination; RMD, 1 week after third romidepsin  
623 infusion; MVA2, 4 weeks after second MVA vaccination.

624

625

626

627

628

629

630

631

632

633

634

635

636

637

638

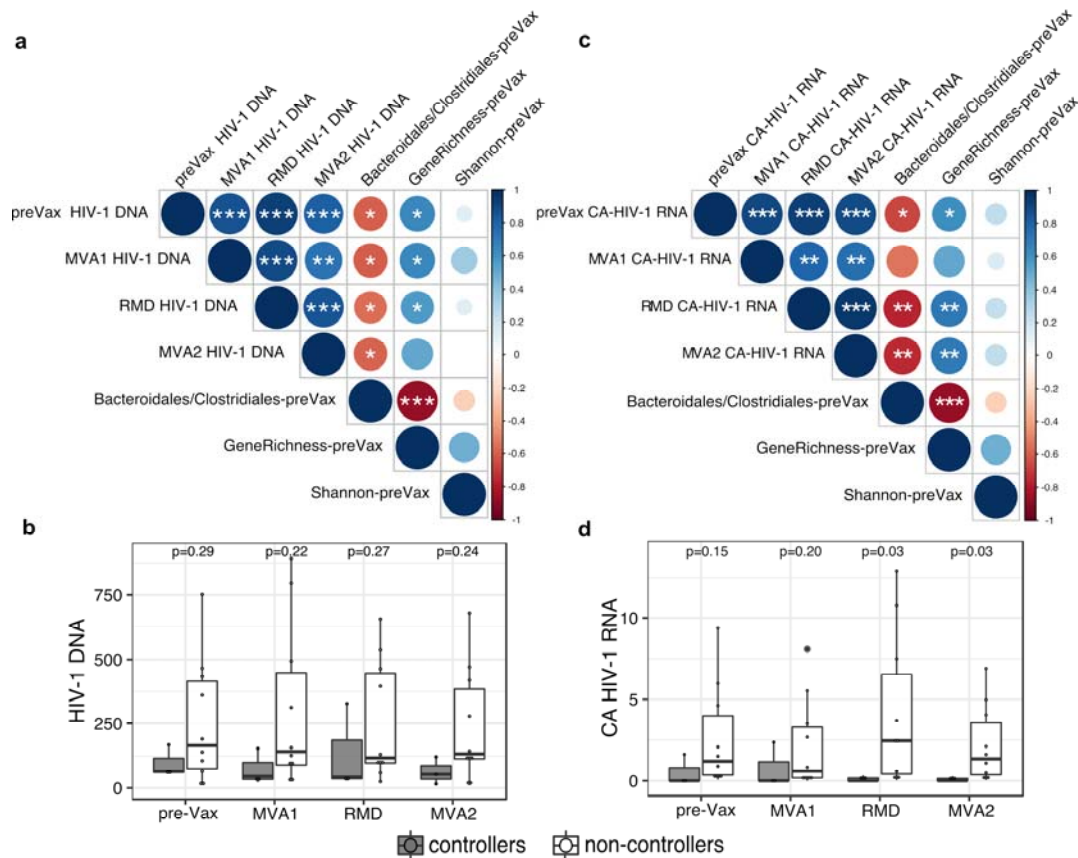

639

640

641 **Fig 3. Associations between HIV-1 reservoir size and gut microbial signatures.** Spearman's correlations

642 between gut microbial signatures (ratio *Bacteroidales/Clostridiales*, gene richness and alpha-diversity

643 Shannon index) and longitudinal (a) HIV-1 DNA (HIV-1 DNA copies/ $10^6$  CD4<sup>+</sup> T-cells) and (c) cell-

644 associated (CA) HIV-1 RNA (HIV-1/TBP relative expression). Positive correlations are indicated in blue and

645 negative correlations, in red. Color and size of the circles indicate the magnitude of the correlation. White

646 asterisks indicate significant correlations (\* $p < 0.05$ ; \*\* $p < 0.01$ ; \*\*\* $p < 0.001$ , Benjamini-Hochberg

647 adjustment for multiple comparisons). Boxplots showing longitudinal comparison of (b) HIV-1 DNA and (d)

648 cell-associated (CA) HIV-1 RNA between controllers and non-controllers. Abbreviations: MAP, monitored

649 antiretroviral pause; pre-Vax, baseline (1 day before first MVA vaccination); MVA1, 1 week after first MVA

650 vaccination; RMD, 1 week after third romidepsin infusion; MVA2, 4 weeks after second MVA vaccination.

651

652

653

654

655

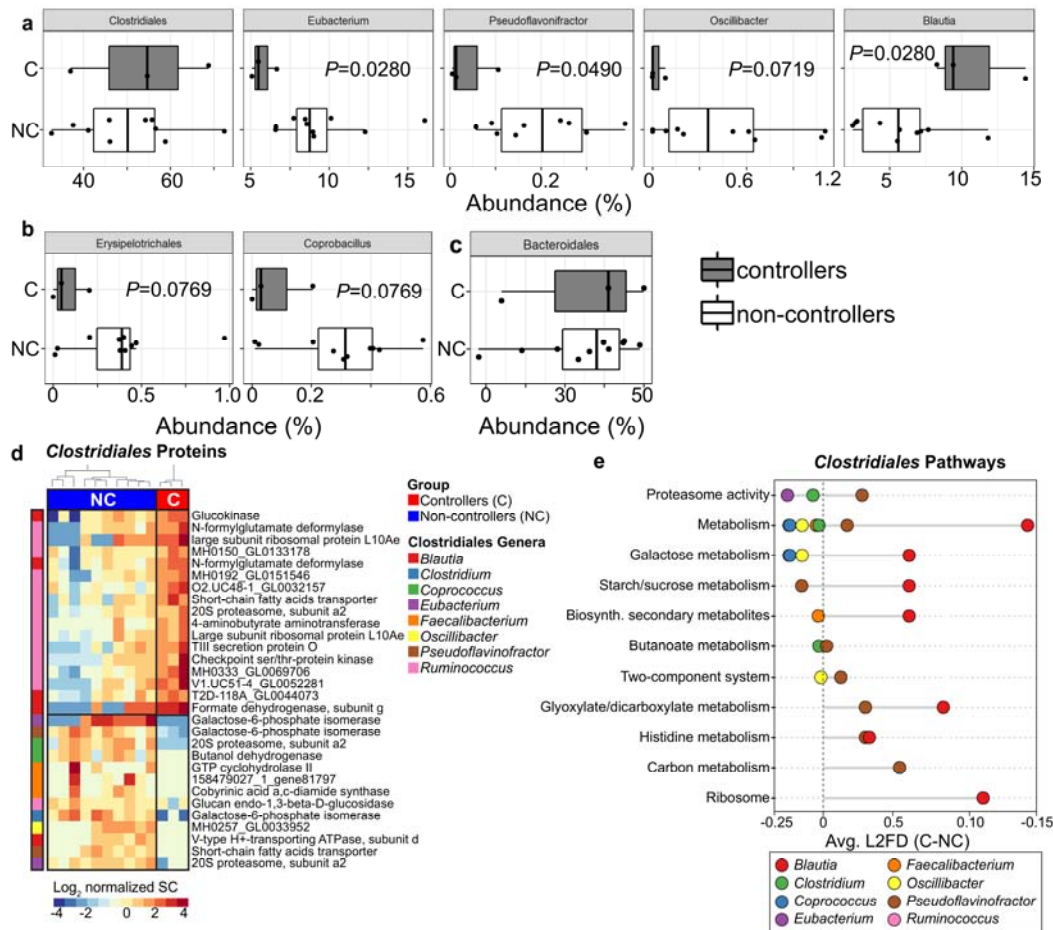

656

657

658 **Fig 4. Baseline metaproteomic signatures associated with HIV control after ART interruption. a-c,**

659 Metaproteomic analysis of gut microbiome in BNC02 participants. Proteins from *Clostridiales* genera and

660 *Erysipelotrichales* were relatively underabundant in controllers compared to non-controllers at baseline pre-

661 vaccination. No differences in *Clostridiales* or *Bacteroidales* proteome at the order-level were observed. **d,**

662 Baseline levels of *Clostridiales* proteins (96 proteins) distinguished controllers from non-controllers.

663 Overabundant proteins belonged to the *Blautia* and *Ruminococcus* genera, while under-abundant proteins

664 belonged to the *Clostridium*, *Coprococcus*, *Eubacterium*, *Faecalibacterium*, *Oscillibacter* and

665 *Pseudoflavinofactor* genera. **e,** Functional annotation of *Clostridiales* bacterial proteins using KEGG gene

666 ontology identified differences in cellular metabolism pathways at baseline between groups. Abbreviations:

667 C=controllers, NC=non-controllers, SC=spectral count.

668

669

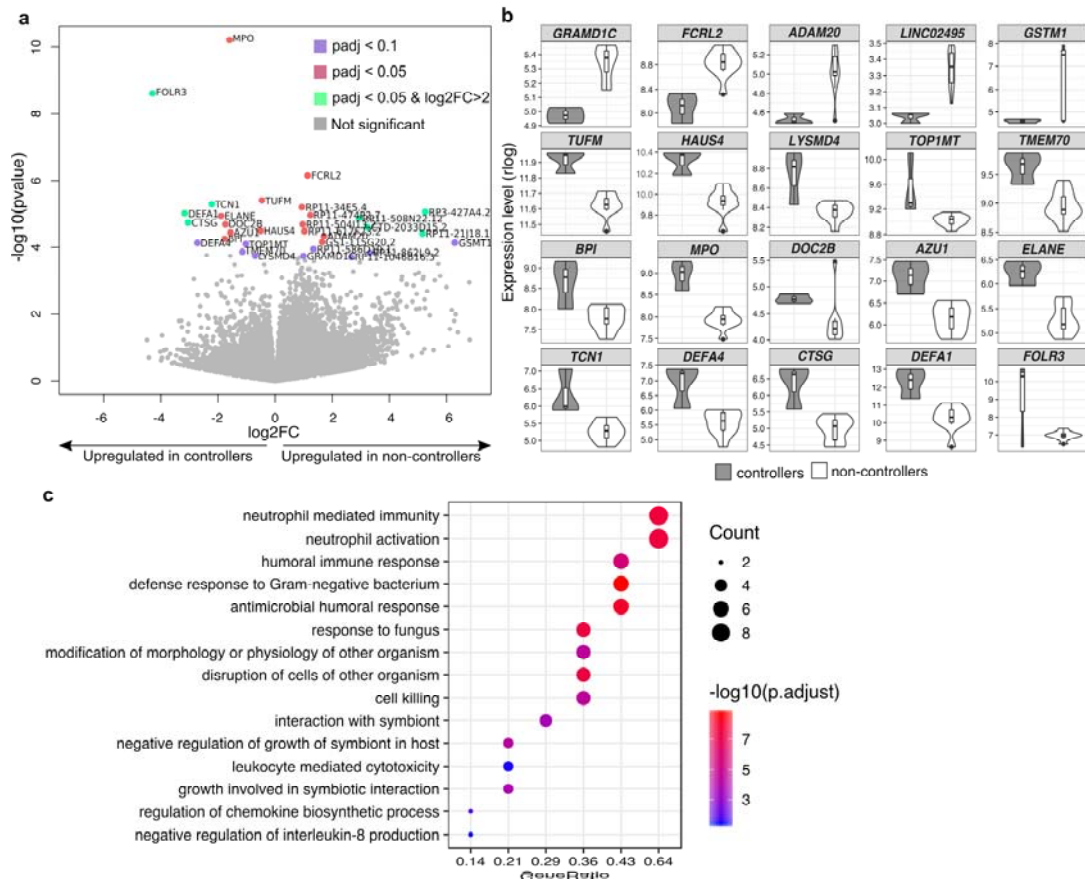

670

671 **Fig 5. Baseline functional enrichment in levels of immune activation and inflammatory**  
 672 **response in viremic controllers.** **a**, Volcano plot of differentially expressed genes between  
 673 controllers and non-controllers at baseline (pre-Vax) with adjusted  $p$ -value  $< 0.1$  (violet dots),  
 674 adjusted  $p$ -value  $< 0.05$  (red dots) and  $\log_2$  (FoldChange)  $> 2$  and adjusted  $p$ -value  $< 0.05$   
 675 (green dots). Gray-colored dots represent genes not displaying statistical significance (adjusted  
 676  $p$ -value  $> 0.1$ ). The  $\log_2$  Fold Change on the x-axis indicates the magnitude of change, while  
 677 the  $-\log_{10}$  (p-value) on the y-axis indicates the significance of each gene. A total of 31 genes  
 678 showed significant differential expression (adjusted  $p$ -value  $< 0.1$ ): 15 and 16 upregulated in  
 679 controllers and non-controllers, respectively. **b**, Violin plots showing relative expression levels  
 680 (rlog, regularized log transformation) of differentially expressed genes with functional  
 681 annotation. **c**, Gene ontology (GO) enrichment analysis of upregulated genes in Controllers. In  
 682 the y-axis, only representative enriched GO terms (biological process) are reported (terms  
 683 obtained after redundancy reduction by REVIGO). X-axis reports the percentage of genes in a  
 684 given GO terms, expressed as 'Gene ratio'. The color key from blue to red indicates low to high  
 685 Bonferroni-adjusted  $\log_{10}$   $p$ -value. Dot sizes are based on the "count" (genes) associated to  
 686 each GO term. Significantly enriched GO terms, number of genes associated to each GO term  
 687 and adjusted  $p$ -values are provided in Additional Table 3.

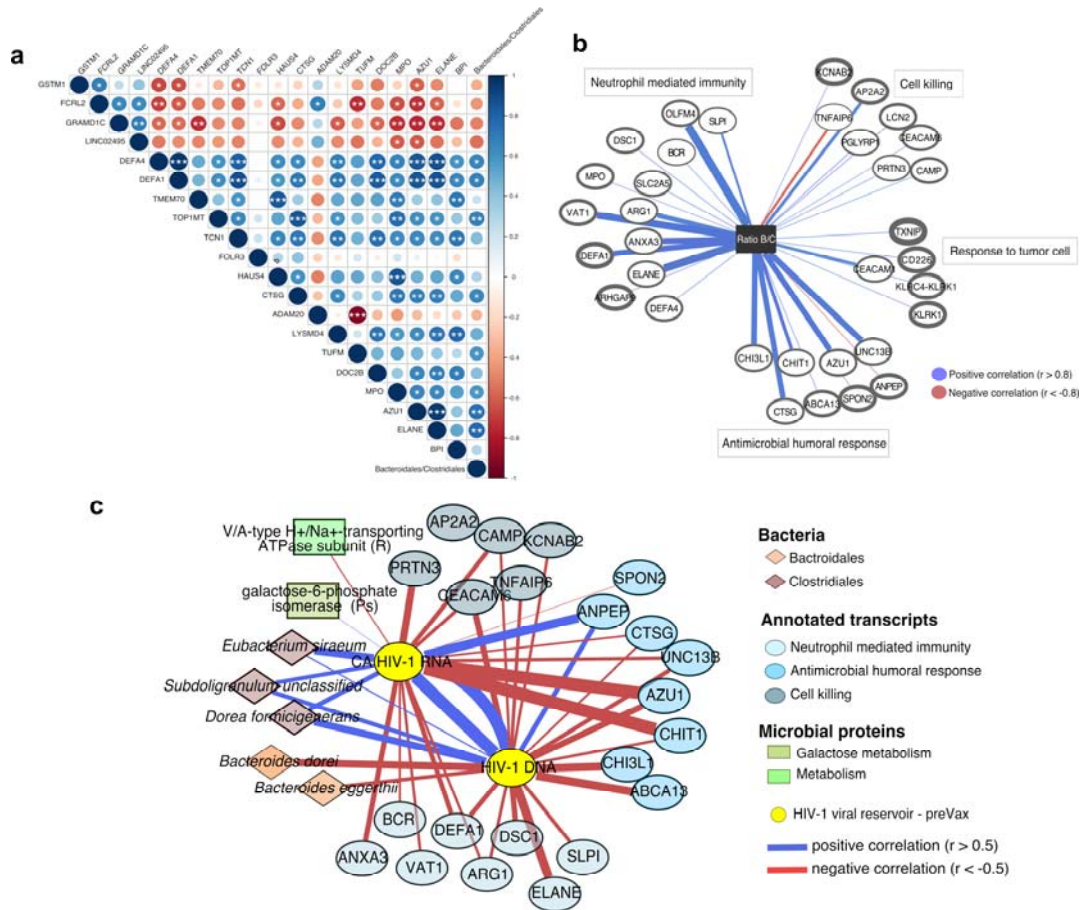

688

689

690 **Fig 6. Integrative analysis of baseline gut microbial signatures, immune activation-related**

691 **transcripts, bacterial proteins and HIV-1 reservoir. a,** Spearman's correlations between the

692 ratio *Bacteroidales/Clostridiales* and DEGs (annotated transcripts). Positive correlations are

693 indicated in blue and negative correlations, in red. Color and size of the circles indicate the

694 magnitude of the correlation. White asterisks indicate significant correlations (\* $p < 0.05$ ; \*\* $p <$

695  $0.01$ ; \*\*\* $p < 0.001$ , Benjamini–Hochberg adjustment for multiple comparisons). **b,** Network

696 visualizing significant Spearman's correlations between the ratio *Bacteroidales/Clostridiales*

697 and transcripts involved in the enrichment analysis described in Additional Table 4. Transcripts

698 are represented as vertices and border width is proportional to transcript expression ( $\log_2$

699  $|\text{cpmTMM}_w0 + 1|$ ) in controllers. Edge width indicates the magnitude of correlation. Red and

700 blue edges represent positive and negative correlation, respectively. **c,** Network showing

701 Spearman's correlation between viral reservoir (CA HIV-1 RNA and HIV-1 DNA), bacterial

702 species within *Bacteroidales* and *Clostridiales*, human transcripts correlated with the ratio

703 *Bacteroidales / Clostridiales* and differentially abundant bacterial proteins ( $p \leq 0.025$ ). Features

704 are showed as vertices and colored by 'omic' dataset. Positive and negative correlations are

705 presented as blue and red edges, respectively. Edge width indicates the magnitude of correlation



706 coefficient. Protein-associated bacterial genera are reported in parentheses. Abbreviations:  
707 DEGs, differentially expressed genes between controllers and non-controllers; R,  
708 *Ruminococcus*; Ps, *Pseudoflavonifactor* and pre-Vax, baseline timepoint (1 day before first  
709 MVA vaccination).

710

711

712

713

714

715

716

717

718

719

720

721

722

723

724

725

726

727

728

729

730

731

732

733

734

735

736

737

738

739

740

741

742

743

744 **Tables**

745

**Table 1.** Study participant demographics and clinical characteristics.

| <b>Variable</b>                                                         | <b>All participants<br/>(n=13)</b> | <b>non-controllers<br/>(n=10)</b> | <b>controllers<br/>(n=3)</b> |
|-------------------------------------------------------------------------|------------------------------------|-----------------------------------|------------------------------|
| <b>Demographics</b>                                                     |                                    |                                   |                              |
| Sex (M/F), <i>n</i>                                                     | 12/1                               | 9/1                               | 3/0                          |
| Risk group (MSM/HTS), <i>n</i>                                          | 12/1                               | 9/1                               | 3/0                          |
| Ethnic group (Caucasian/Latin), <i>n</i>                                | 12/1                               | 9/1                               | 3/0                          |
| Age (years)                                                             | 42 (39-47)                         | 43 (39-47)                        | 34 (33-38)                   |
| BMI (Kg/m <sup>2</sup> )                                                | 22.9 (20.9-24)                     | 22.3 (21.1-23.4)                  | 24.3 (22.2-25)               |
| <b>Treatment and clinical characteristics</b>                           |                                    |                                   |                              |
| ART regimen, <i>n</i><br>(TDF_FTC_RAL/ABC_3TC_RAL/ABC_3TC_DTG)          | 2/9/2                              | 2/6/2                             | 0/3/0                        |
| Viral reservoir (HIV-1 DNA cp/10 <sup>6</sup> CD4 <sup>+</sup> T-cells) | 140 (65-361)                       | 165 (76.2-415.7)                  | 65 (62.5-116.5)              |
| CD4 <sup>+</sup> T-cell (cells/mm <sup>3</sup> )                        | 728 (648-1182)                     | 839 (581.8-1293.8)                | 657 (652.5-814)              |
| CD4 <sup>+</sup> T-cell (%)                                             | 42.9 (42.2-49.3)                   | 43.4 (42.3-48.1)                  | 42.2 (38.4-48.1)             |
| CD4/CD8 T-cell counts ratio                                             | 1.4 (1.2-1.6)                      | 1.4 (1.2-1.5)                     | 1.3 (1.1-1.6)                |

746

747 Continuous data are presented using median, 25% and 75% interquartile range, unless otherwise  
748 described.

749 M, male; F, female; MSM, men who have sex with men; HTS, heterosexual; BMI, body mass  
750 index; ART, antiretroviral therapy; cp, copies; TDF, Tenofovir Disoproxil Fumarate; FTC,  
751 Emtricitabine; RAL, Raltegravir; ABC, Abacavir; 3TC, Lamivudine; DTG, Dolutegravir. No  
752 statistically significant differences were observed ( $p \leq 0.05$ ; Wilcoxon rank-sum test
